# Supplementary material for: Corrosion protection properties of tetraphenylethylene-based inhibitors toward carbon steel in acidic medium
Source: Royal Society of Chemistry journal article supplement (doi:10.1039/d2ra08062a), 2023-01-01
Supplement: d2ra08062a1.pdf [file d2ra08062a1.pdf]

## **Electronic Supplementary Information**

### **Corrosion protection properties of tetraphenylethylene-based inhibitors toward carbon steel in acidic medium**

Yumeng Chen,<sup>‡</sup> Yiming An,<sup>‡</sup> Jing Ma, Zhihua Zhang, Fulin Qiao, Xue Lei, Fei Sun\*, Chunlu Wang\*, Song Gao, Yue Zhao, Jinhua Wang, Xiaoping Fu, Hui Wang, Zhengqi Yu

Sinopec Research Institute of Petroleum Processing Co., Ltd., Beijing 100083, P. R. China

\*Corresponding authors

sunfei.ripp@sinopec.com (Fei Sun)

wcl.ripp@sinopec.com (Chunlu Wang)

## Contents

|                                                                     |            |
|---------------------------------------------------------------------|------------|
| <b>1. General Information .....</b>                                 | <b>S3</b>  |
| <b>2. Synthesis and characterization .....</b>                      | <b>S4</b>  |
| <b>3. Corrosion inhibitors for carbon steel in literature .....</b> | <b>S8</b>  |
| <b>4. SEM images .....</b>                                          | <b>S9</b>  |
| <b>5. Electrochemical measurements .....</b>                        | <b>S17</b> |

## 1. General Information

Tetraphenylethylene was purchased from Alfa Aesar. Raney Ni,  $\text{N}_2\text{H}_4 \cdot \text{H}_2\text{O}$ , NaSCN were purchased from Sinopharm Chemical Reagent Co., Ltd.  $\text{HNO}_3$ ,  $\text{H}_2\text{SO}_4$  and other reagents were analytical grade and purchased from Beijing Chemical Works. All the reagents were used without further purification.

$^1\text{H}$  NMR and  $^{13}\text{C}$  NMR spectra were recorded on Bruker Avance 400 MHz. High-resolution mass spectra (HRMS, ESI) were obtained with Bruker Solarix-FT-ICR MS. UV-Vis absorption spectra were recorded on a Perkin Elmer Lambda 750 Spectrophotometer. Fluorescence (FL) spectra were collected on a Hitachi F-7100 Fluorescence Spectrophotometer. X-ray photoelectron spectroscopy (XPS) spectra were studied on a Thermo Fisher Scientific Escalab Xi+ Spectrometer. Scanning electron microscope (SEM) images of brass coupons were studied on a Hitachi S-4800 Microscope.

Weight loss experiment procedures. Prior to the experiment, all carbon steel coupons were rinsed with absorbent cotton in ethanol and dried in cold air, then weighed by an electronic balance with precision of  $\pm 0.1$  mg. Then the coupons were immersed into 0.5 M  $\text{H}_2\text{SO}_4$  solutions in the absence or presence of different concentrations of various compounds at 60 °C, steadily stirred by a magnetic stir bar. For each measurement, a freshly prepared solution was used. The immersion time for carbon steel coupons is 4 h. Then, the coupons were taken out from the corrosive medium and rinsed with absorbent cotton in chemical descaling solution (10% HCl + 0.5% Urotropin) and deionized water, dried in cold air and weighed with precision of  $\pm 0.1$  mg, successively. Afterwards, these coupons were used for XPS and SEM studies, respectively.

## 2. Synthesis and characterization

Upon variation of reactant ratios and reaction time, tetraphenylethylene (TPE) could be nitrated into different nitro-substituted tetraphenylethylenes (TPE-NO<sub>2</sub>, TPE-2NO<sub>2</sub>, TPE-3NO<sub>2</sub>, and TPE-4NO<sub>2</sub>) with HNO<sub>3</sub> and HOAc. Next, they were reduced to corresponding amino-substituted tetraphenylethylenes (TPE-NH<sub>2</sub>, TPE-2NH<sub>2</sub>, TPE-3NH<sub>2</sub>, and TPE-4NH<sub>2</sub>) in the presence of Raney Ni and N<sub>2</sub>H<sub>4</sub>·H<sub>2</sub>O. Afterwards, they were respectively reacted with H<sub>2</sub>SO<sub>4</sub>, giving rise to the intermediate compounds. Subsequently, anion exchange reactions of these intermediates with NaSCN led to target compounds (**1**, **2**, **3** and **4**). Thereinto, nitro-substituted tetraphenylethylenes (TPE-NO<sub>2</sub>, TPE-2NO<sub>2</sub>, TPE-3NO<sub>2</sub>, and TPE-4NO<sub>2</sub>) and amino-substituted tetraphenylethylenes (TPE-NH<sub>2</sub>, TPE-2NH<sub>2</sub>, TPE-3NH<sub>2</sub>, and TPE-4NH<sub>2</sub>) were produced in line with literatures [S1-S5].

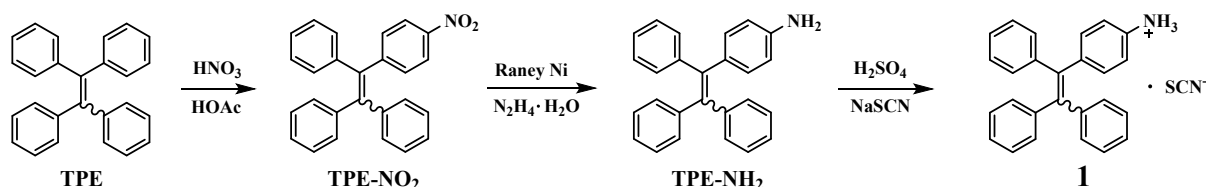

**Synthesis of 1:** In a 50 mL round-bottom flask, *p*-amino-tetraphenylethylene TPE-NH<sub>2</sub> (695 mg, 2.0 mmol) was dissolved in mixed solvent of acetone (10 mL) and ethanol (10 mL). Then, concentrated sulfuric acid (110 mg, 1.1 mmol) was added slowly, with emergence of insoluble sediment immediately. The mixture was stirred for 30 min and filtered. The residue was washed with ethanol for more than three times. Then, it was dispersed into ethanol (20 mL) in a 50 mL round-bottom flask. An ethanol (5 mL) solution dissolved with sodium thiocyanate (152 mg, 2.0 mmol) was added. The mixture was heated to 50 °C and stirred for 1



h. After being cooled to room temperature, the mixture was centrifuged and filtered. The organic phase was evaporated and dried in vacuum, to afford **1** as yellow solid (772 mg) in 94% yield.  $^1\text{H}$  NMR (400 MHz, DMSO- $d_6$ ):  $\delta$  7.30 – 7.22 (1 H, m), 7.20 – 7.08 (9 H, m), 7.07 – 7.03 (2 H, m), 7.02 – 6.93 (6 H, m), 6.90 – 6.86 (1 H, d);  $^{13}\text{C}$  NMR (100 MHz, DMSO- $d_6$ ):  $\delta$  143.24, 142.96, 142.80, 141.09, 140.29, 140.12, 139.46, 131.95, 130.93, 130.60, 129.56, 127.93, 126.67, 126.53, 121.75, 121.40; HRMS (ESI, positive): calcd. for  $\text{C}_{26}\text{H}_{22}\text{N}$  (m/z): 348.17468; found: 348.17462.

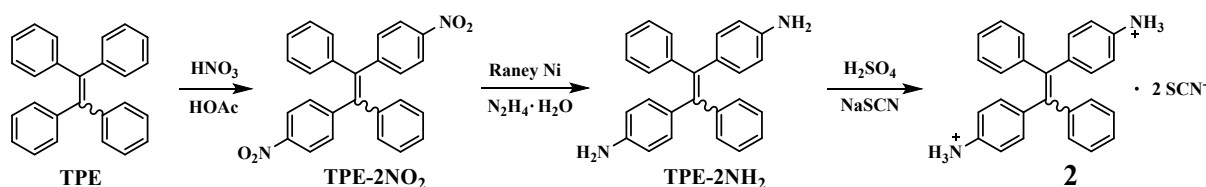

**Synthesis of 2:** In a 50 mL round-bottom flask, bis-*p*-amino-tetraphenylethylene TPE-2NH<sub>2</sub> (724 mg, 2.0 mmol) was dissolved in mixed solvent of acetone (15 mL) and ethanol (15 mL). Then, concentrated sulfuric acid (220 mg, 2.2 mmol) was added slowly, with emergence of insoluble sediment immediately. The mixture was stirred for 30 min and filtered. The residue was washed with ethanol for more than three times. Then, it was dispersed into ethanol (20 mL) was stirred in a 50 mL round-bottom flask. An ethanol (5 mL) solution dissolved with sodium thiocyanate (324 mg, 4.0 mmol) was added. The mixture was heated to 50 °C and stirred for 1 h. After being cooled to room temperature, the mixture was centrifuged and filtered. The organic phase was evaporated and dried in vacuum, to afford **2** as yellow solid (902 mg) in 94% yield.  $^1\text{H}$  NMR (400 MHz, DMSO- $d_6$ ):  $\delta$  7.20 – 7.11 (6 H, m), 7.10 – 7.03 (8 H, m), 7.01 – 6.95 (4 H, d);  $^{13}\text{C}$  NMR (100 MHz, DMSO- $d_6$ ):  $\delta$  142.76, 141.76, 138.45,

131.99, 131.55, 130.58, 129.78, 128.07, 126.88, 122.00; HRMS (ESI, positive): calcd. for  $C_{26}H_{23}N_2$   $[M - H^+]$  (m/z): 363.18558; found: 363.18574. calcd. for  $C_{26}H_{22}N_2Na$   $[M - 2H^+ + Na^+]$  (m/z): 385.16752; found: 385.16772.

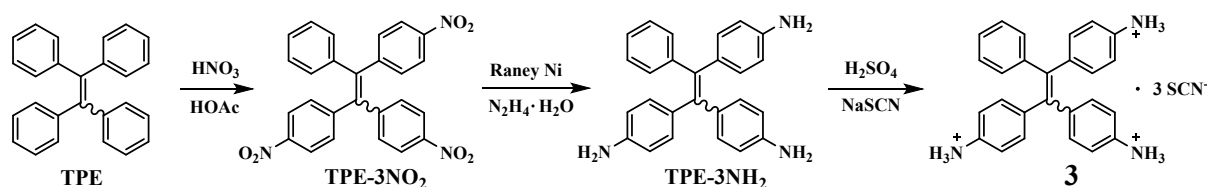

**Synthesis of 3:** In a 50 mL round-bottom flask, tri-*p*-amino-tetraphenylethylene TPE-3NH<sub>2</sub> (755 mg, 2.0 mmol) was dissolved in mixed solvent of acetone (15 mL) and ethanol (15 mL). Then, concentrated sulfuric acid (330 mg, 3.3 mmol) was added slowly, with emergence of insoluble sediment immediately. The mixture was stirred for 30 min and filtered. The residue was washed with ethanol for more than three times. Then, it was dispersed into ethanol (20 mL) was stirred in a 50 mL round-bottom flask. An ethanol (5 mL) solution dissolved with sodium thiocyanate (486 mg, 6.0 mmol) was added. The mixture was heated to 50 °C and stirred for 1 h. After being cooled to room temperature, the mixture was centrifuged and filtered. The organic phase was evaporated and dried in vacuum, to afford **3** as yellow solid (1045 mg) in 94% yield. <sup>1</sup>H NMR (400 MHz, DMSO-*d*<sub>6</sub>): δ 7.34 – 7.21 (4 H, m), 7.20 – 7.06 (4 H, m), 7.05 – 6.95 (3 H, m), 6.94 – 6.76 (6 H, m); <sup>13</sup>C NMR (100 MHz, DMSO-*d*<sub>6</sub>): δ 142.82, 140.90, 140.67, 140.11, 138.98, 133.68, 133.16, 132.73, 131.91, 130.60, 128.18, 128.03, 126.80, 121.26; HRMS (ESI, positive): calcd. for  $C_{26}H_{24}N_3$   $[M - 2H^+]$  (m/z): 378.19647; found: 378.19655.

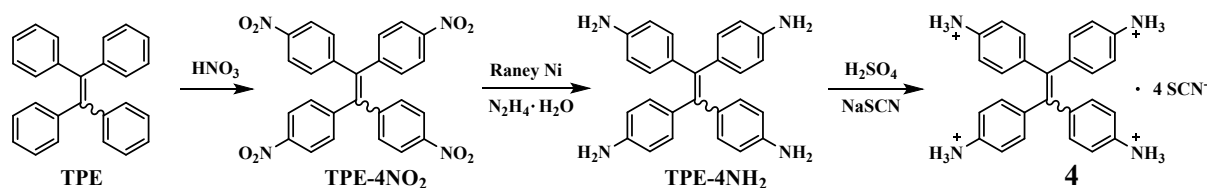

**Synthesis of 4:** In a 50 mL round-bottom flask, tetra-*p*-amino-tetraphenylethylene TPE-4NH<sub>2</sub> (785 mg, 2.0 mmol) was dissolved in mixed solvent of acetone (15 mL) and ethanol (15 mL). Then, concentrated sulfuric acid (440 mg, 4.4 mmol) was added slowly, with emergence of insoluble sediment immediately. The mixture was stirred for 30 min and filtered. The residue was washed with ethanol for more than three times. Then, it was dispersed into ethanol (20 mL) was stirred in a 50 mL round-bottom flask. An ethanol (5 mL) solution dissolved with sodium thiocyanate (649 mg, 8.0 mmol) was added. The mixture was heated to 50 °C and stirred for 1 h. After being cooled to room temperature, the mixture was centrifuged and filtered. The organic phase was evaporated and dried in vacuum, to afford **4** as yellow solid (1170 mg) in 93% yield. <sup>1</sup>H NMR (400 MHz, DMSO-*d*<sub>6</sub>): δ 7.40 – 7.35 (8 H, d), 7.12 – 7.07 (8 H, d); <sup>13</sup>C NMR (100 MHz, DMSO-*d*<sub>6</sub>): δ 140.94, 139.28, 131.98, 129.89, 121.56; HRMS (ESI, positive): calcd. for C<sub>26</sub>H<sub>25</sub>N<sub>4</sub> [M – 3H<sup>+</sup>] (m/z): 393.20737; found: 393.20744.

### 3. Corrosion inhibitors for carbon steel in literature

**Table S1.** List of corrosion inhibitors for carbon steel in 0.5 M H<sub>2</sub>SO<sub>4</sub> in literature.

| Inhibitor                                                                | Concentration | Carbon steel      | Method      | Temperature | Inhibition efficiency | Mechanism of action | $\Delta G_{ads}$ (kJ/mol) | Adsorption isotherm | Reference |
|--------------------------------------------------------------------------|---------------|-------------------|-------------|-------------|-----------------------|---------------------|---------------------------|---------------------|-----------|
| Methionine                                                               | 10 mM         | Carbon steel      | EIS         | 25°C        | 85.92%                |                     |                           |                     | [S6]      |
| 2-amino-5-(3-pyridyl)-1,3,4-thiadiazole(3-APTD)                          | 6 mM          | Mild steel        | EIS         | 30°C        | 92%                   |                     | -33.36                    | Langmuir            | [S7]      |
| 2-amino-5-(4-pyridyl)-1,3,4-thiadiazole (4-APTD)                         | 6 mM          | Mild steel        | EIS         | 30°C        | 95%                   |                     | -33.34                    | Langmuir            | [S7]      |
| Hexadecylpyridinium bromide (HDPB)                                       | 1 mM          | Mild steel        | EIS         | 60°C        | 91%                   | Mixed-type          | -39.50                    | Bockris-Swinkels    | [S8]      |
| Polyaspartic acid (PASP)                                                 | 2 g/L         | Mild steel        | Weight-loss | 303 K       | 87.9%                 |                     |                           |                     | [S9]      |
| 2-[4-(2-chlorobenzyl)-3-methyl-6-thioxopyridazin-1(6H)-yl]acetohydrazide | 25 mM         | Steel             | Weight-loss | 298 K       | 99%                   |                     | -18.76                    | Temkin              | [S10]     |
| N,N-Diethylammonium O,O'-di(4-bromophenyl)dithiophosphate (Br-NOP)       | 100 mg/L      | Q235 steel        | EIS         | 300 K       | 98.07%                |                     | -39.61                    | Langmuir            | [S11]     |
| Omeprazole (OMP)                                                         | 300 mg/L      | X60 Steel         | EIS         | 298 K       | 92.52%                |                     | -26.06                    | Langmuir            | [S12]     |
| Mikania micrantha extract (MME)                                          | 100 mg/L      | Cold rolled steel | Weight-loss | 303 K       | 72.0%                 |                     | -27.25                    | Langmuir            | [S13]     |
| 3-phenyl-4-methylthiazol-2(3H)-thione                                    | 20 mM         | Carbon steel      | Weight-loss | 303 K       | 95.0%                 | Mixed-type          | -39.38                    | Langmuir            | [S14]     |
| 3-(2-methyl-phenyl)-4-methylthiazol-2(3H)-thione                         | 20 mM         | Carbon steel      | Weight-loss | 303 K       | 91.3%                 | Mixed-type          | -38.03                    | Langmuir            | [S14]     |
| 3-(2-methoxyphenyl)-4-methylthiazol-2 (3H)-thione                        | 20 mM         | Carbon steel      | Weight-loss | 303 K       | 83.2%                 | Mixed-type          | -31.90                    | Langmuir            | [S14]     |
| Alloxazine (ALLOX)                                                       | 10 $\mu$ M    | Mild steel        | Weight-loss | 303 K       | 96.0%                 |                     | -10.32                    | Temkin              | [S15]     |
| octylphenol polyethylene oxide (OPPEO)                                   | 50 mM         | Low-carbon steel  | EIS         | 303 K       | 95.0%                 |                     | -40                       | Flory-Huggins       | [S16]     |

#### 4. SEM images

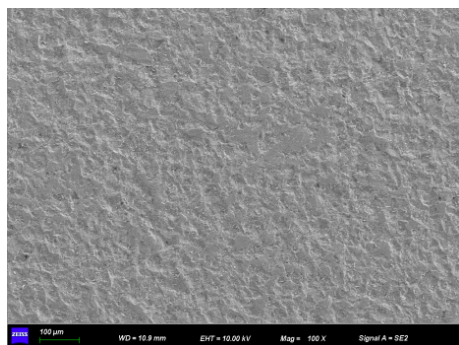

(a)

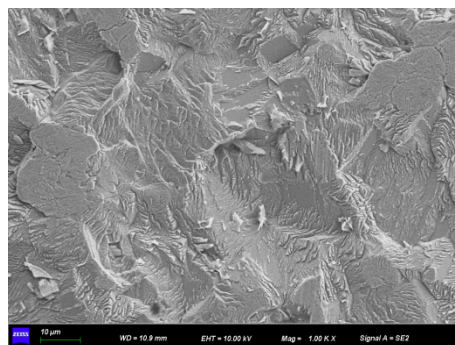

(b)

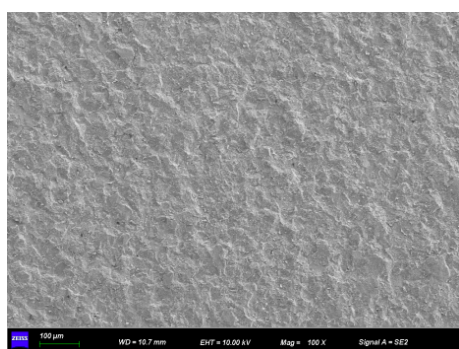

(c)

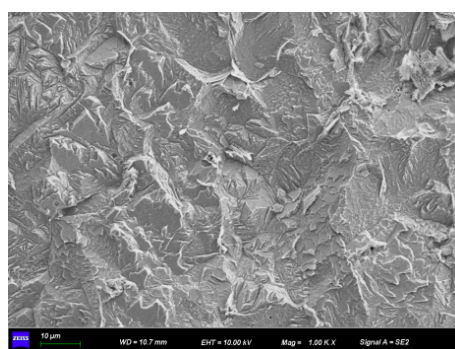

(d)

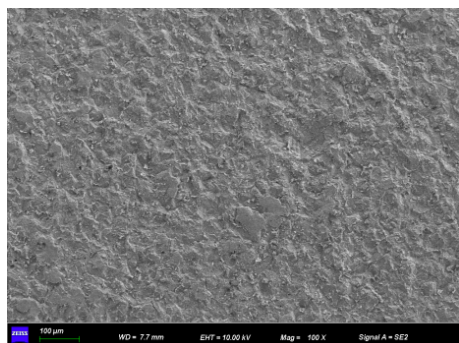

(e)

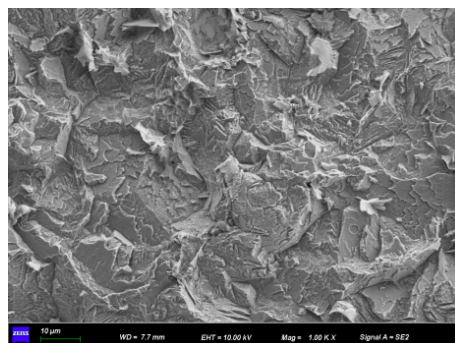

(f)

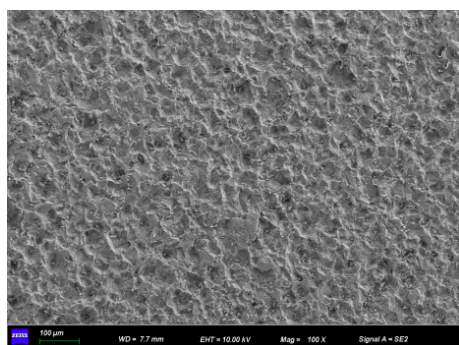

(g)

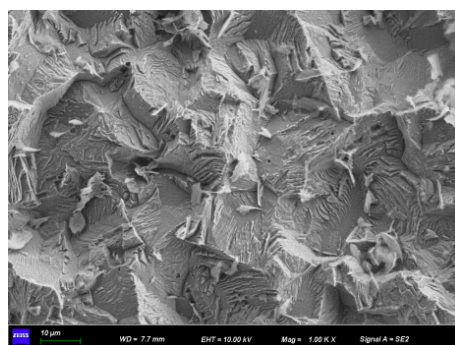

(h)

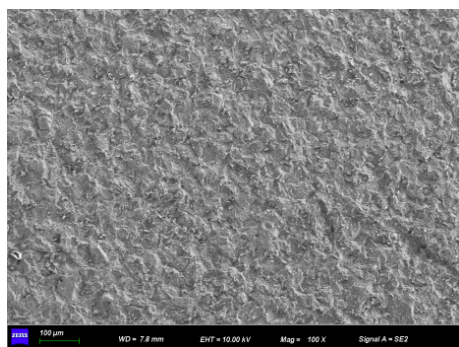

(i)

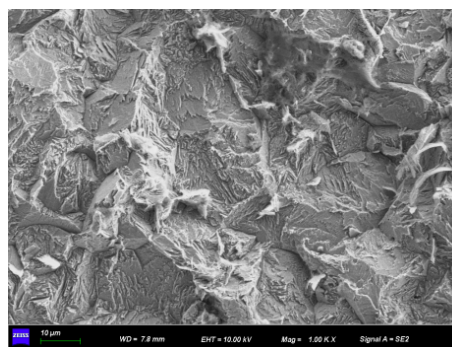

(j)

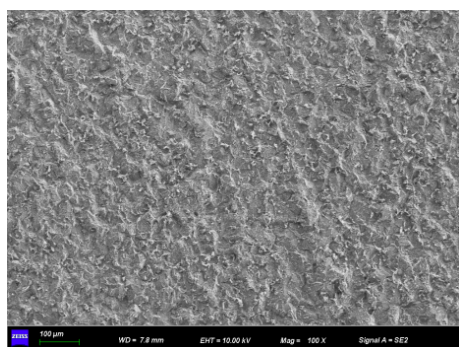

(k)

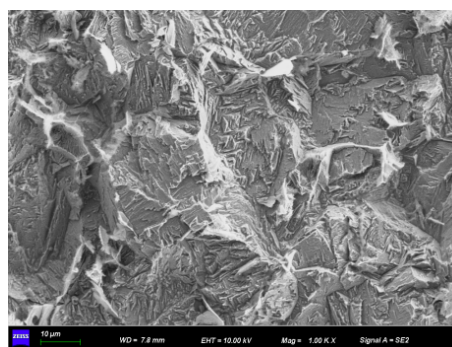

(l)

**Fig. S1.** SEM images of carbon steel coupons in the presence of increasing concentrations of **1** after weight loss measurements. (a, b) 5 mg/L; (c, d) 10 mg/L; (e, f) 20 mg/L; (g, h) 40 mg/L; (i, j) 70 mg/L; (k, l) 100 mg/L. Scale: 100 µm for (a, c, e, g, i, k) and 10 µm for (b, d, f, h, j, l).



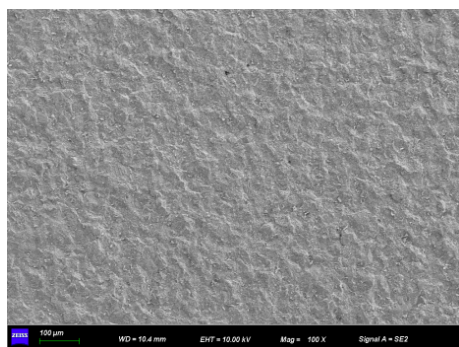

(a)

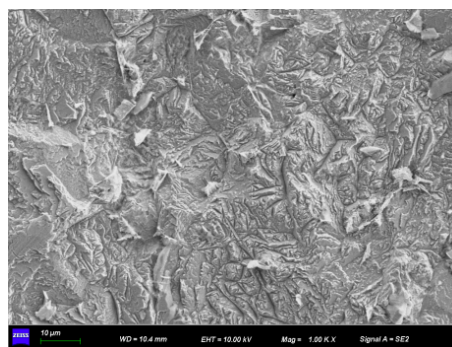

(b)

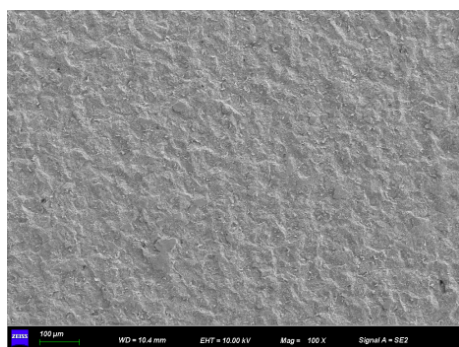

(c)

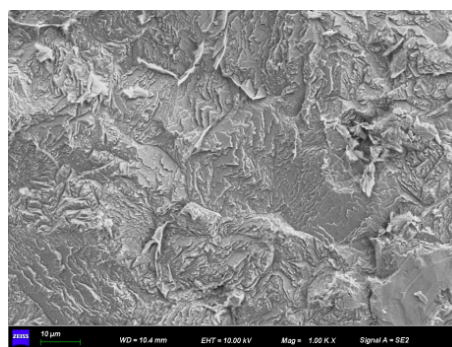

(d)

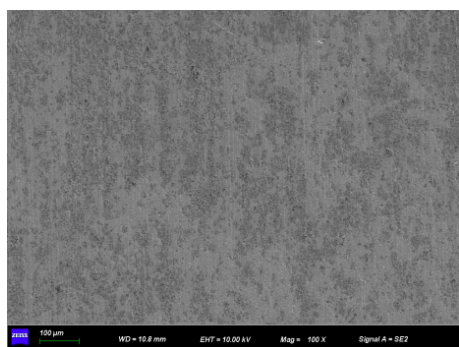

(e)

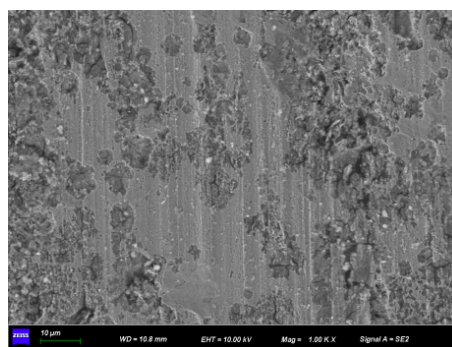

(f)

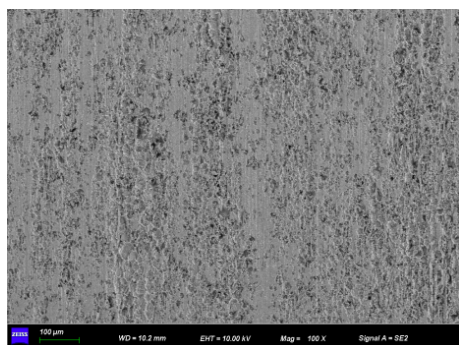

(g)

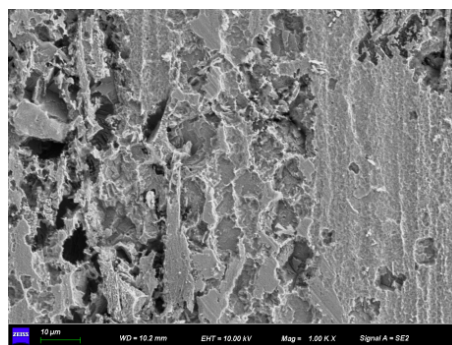

(h)

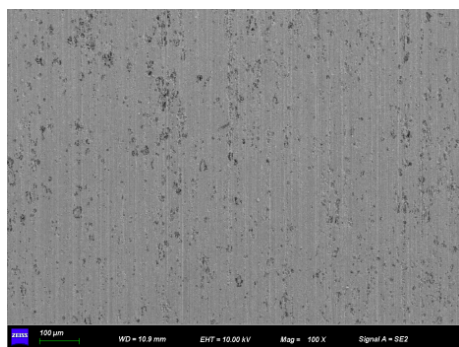

(i)

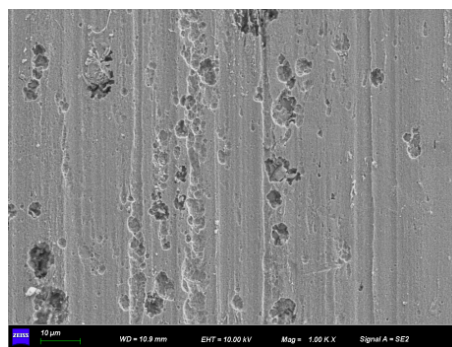

(j)

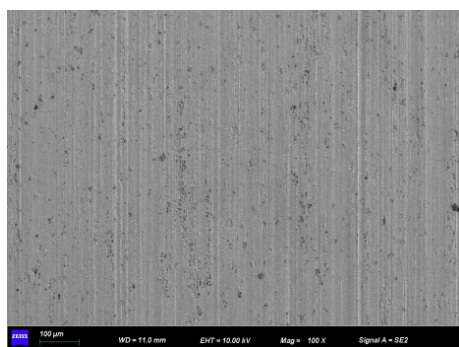

(k)

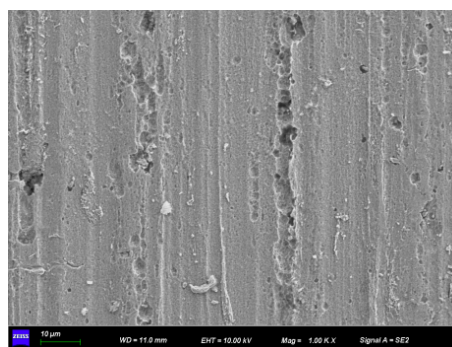

(l)

**Fig. S2.** SEM images of carbon steel coupons in the presence of increasing concentrations of **2** after weight loss measurements. (a, b) 5 mg/L; (c, d) 10 mg/L; (e, f) 20 mg/L; (g, h) 40 mg/L; (i, j) 70 mg/L; (k, l) 100 mg/L. Scale: 100 µm for (a, c, e, g, i, k) and 10 µm for (b, d, f, h, j, l).



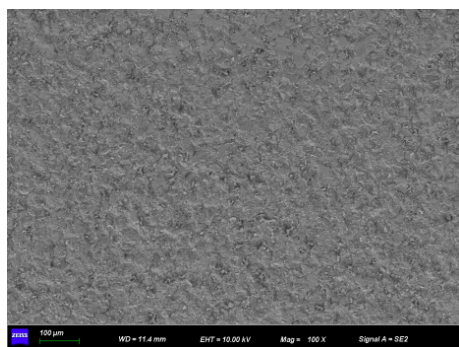

(a)

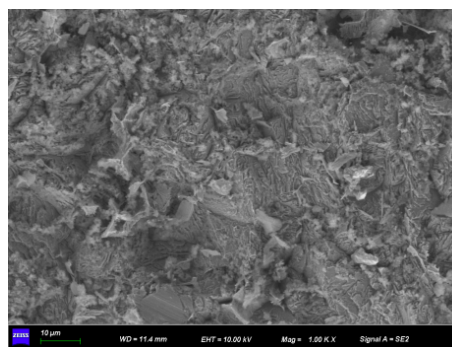

(b)

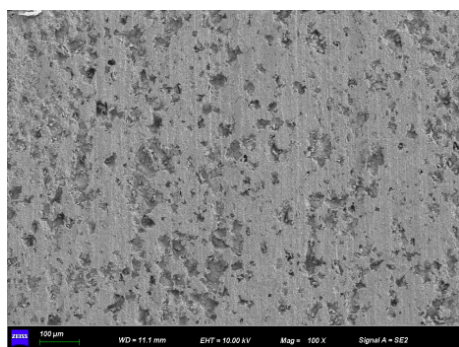

(c)

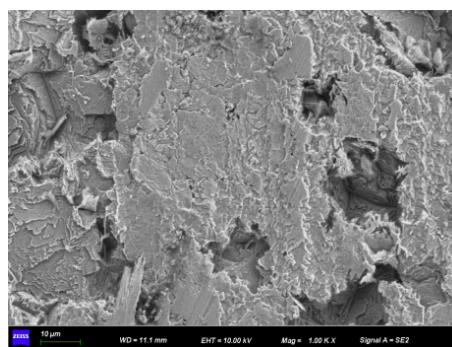

(d)

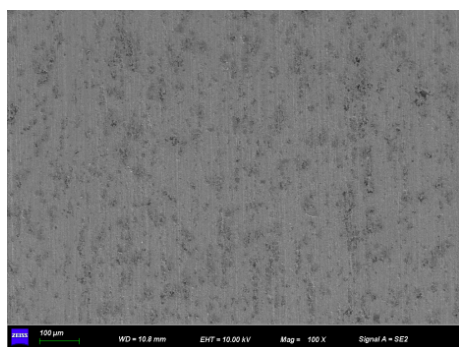

(e)

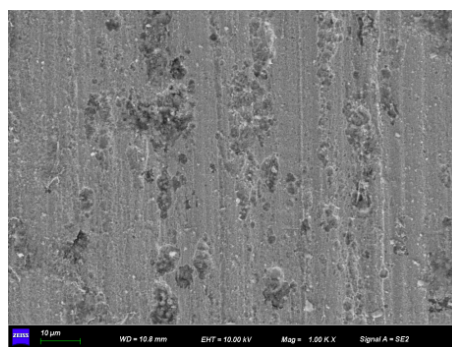

(f)

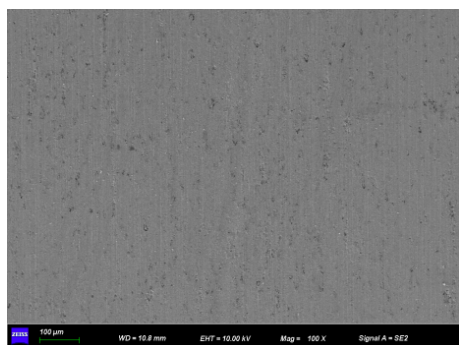

(g)

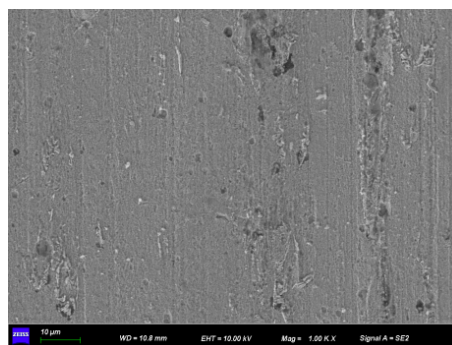

(h)

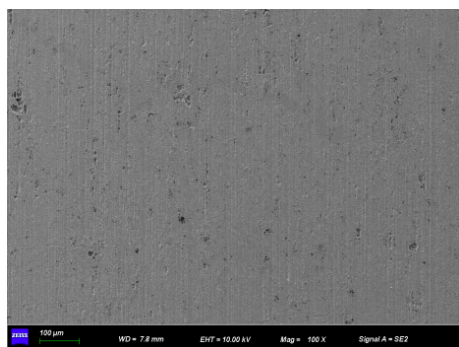

(i)

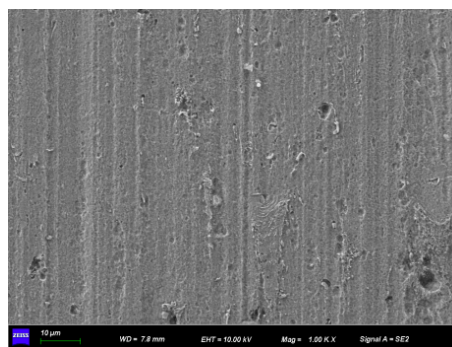

(j)

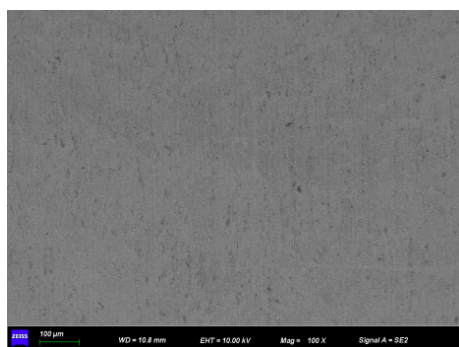

(k)

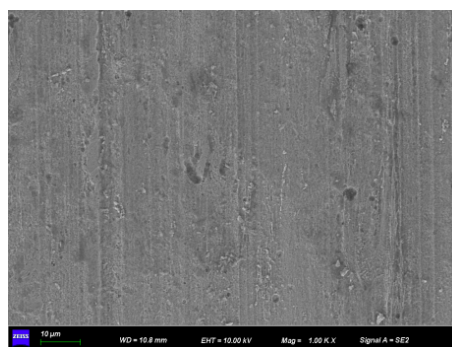

(l)

**Fig. S3.** SEM images of carbon steel coupons in the presence of increasing concentrations of **3** after weight loss measurements. (a, b) 5 mg/L; (c, d) 10 mg/L; (e, f) 20 mg/L; (g, h) 40 mg/L; (i, j) 70 mg/L; (k, l) 100 mg/L. Scale: 100  $\mu\text{m}$  for (a, c, e, g, i, k) and 10  $\mu\text{m}$  for (b, d, f, h, j, l).

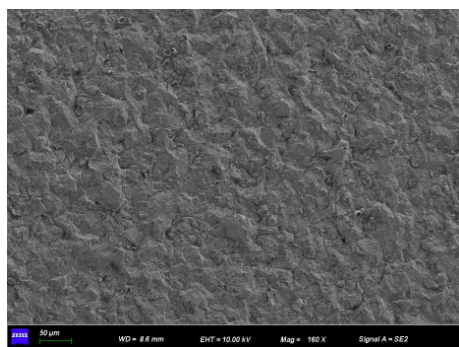

(a)

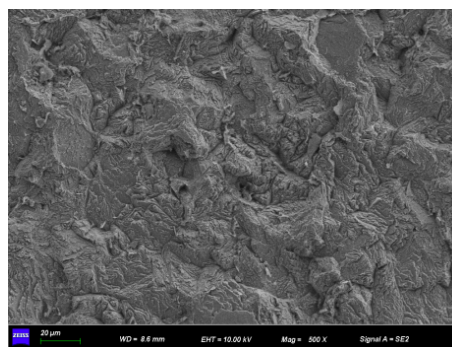

(b)

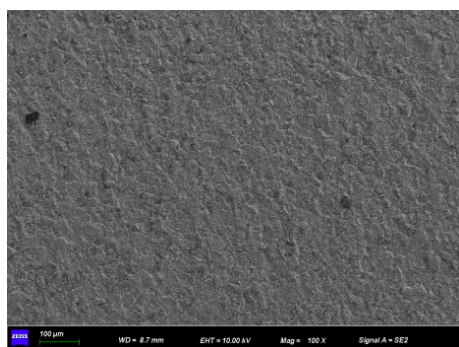

(c)

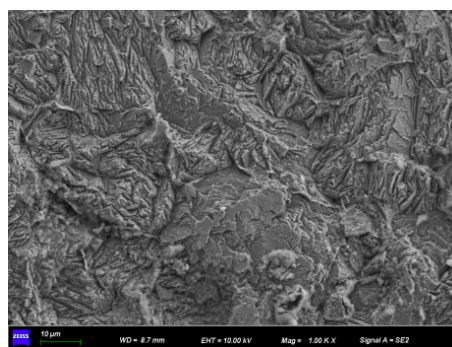

(d)

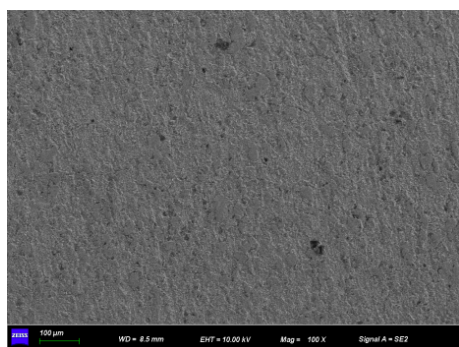

(e)

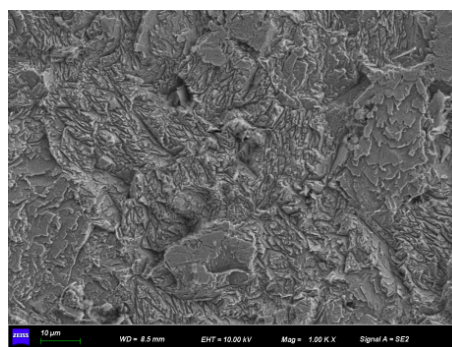

(f)

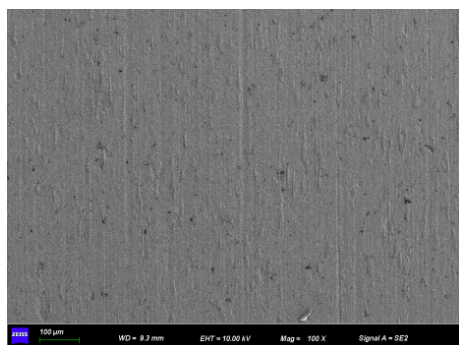

(g)

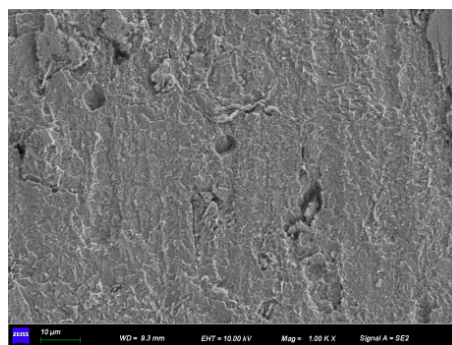

(h)



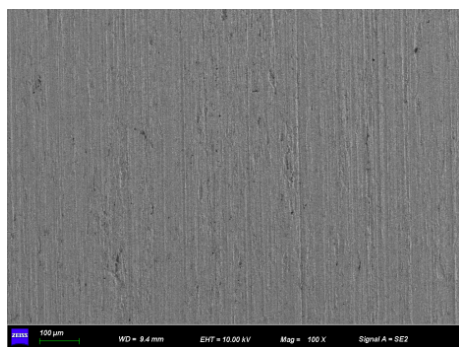

(i)

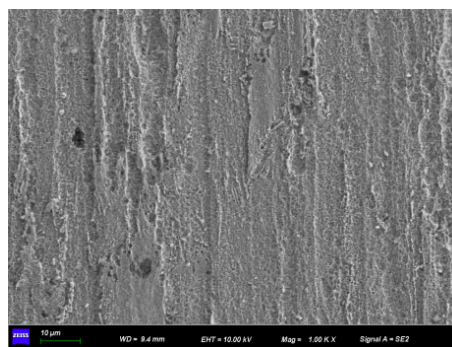

(j)

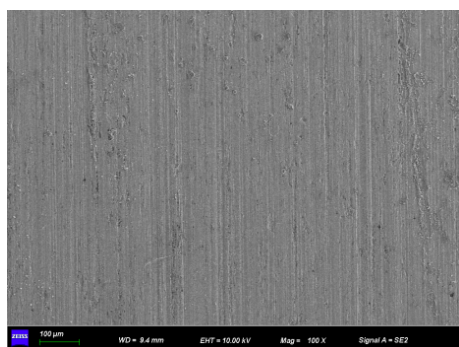

(k)

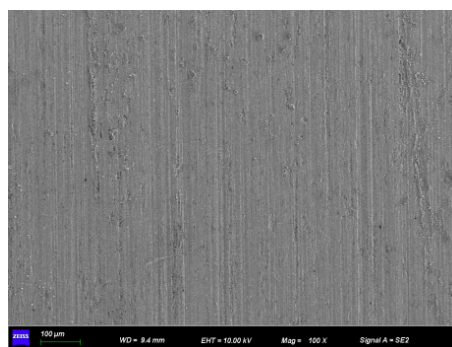

(l)

**Fig. S4.** SEM images of carbon steel coupons in the presence of increasing concentrations of **4** after weight loss measurements. (a, b) 5 mg/L; (c, d) 10 mg/L; (e, f) 20 mg/L; (g, h) 40 mg/L; (i, j) 70 mg/L; (k, l) 100 mg/L. Scale: 100 µm for (a, c, e, g, i, k) and 10 µm for (b, d, f, h, j, l).

## 5. Electrochemical measurements

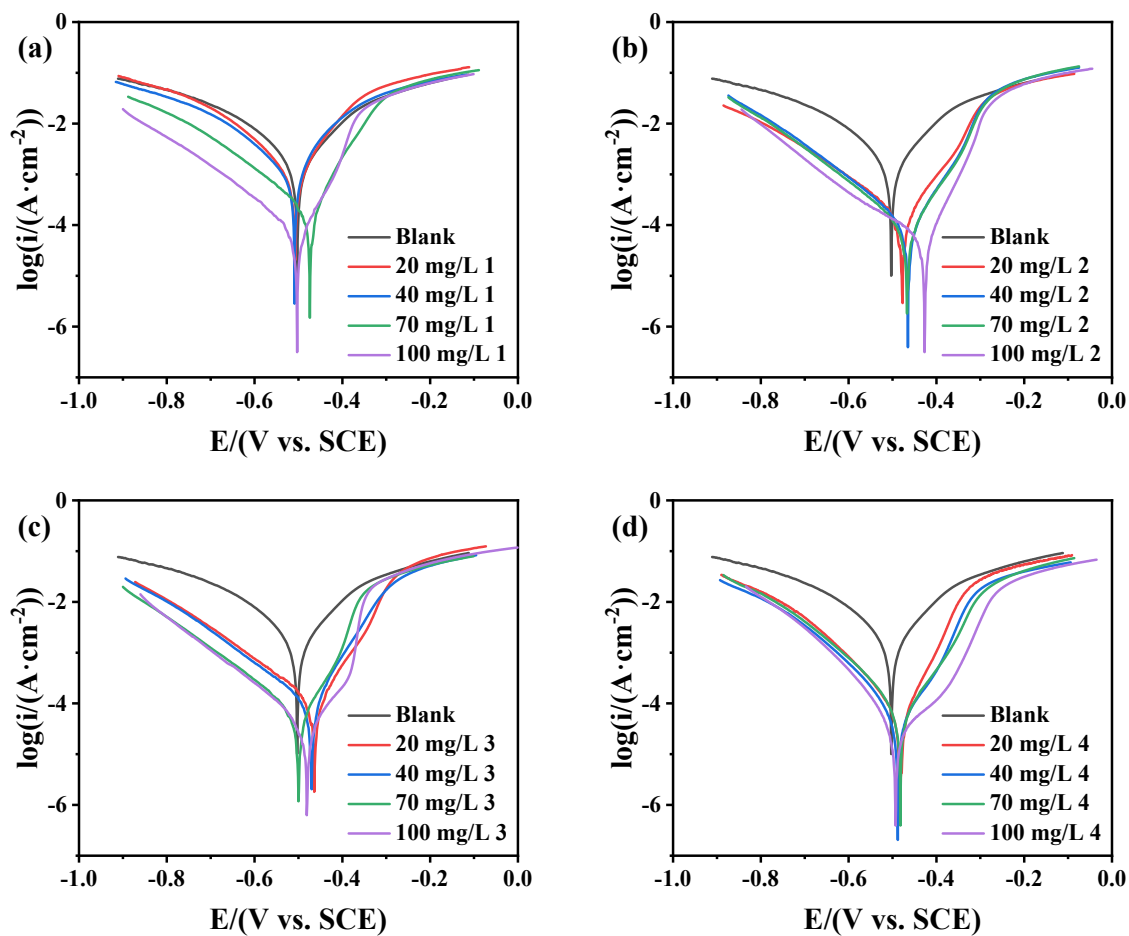

**Fig. S5.** PDP curves for carbon steel in the absence or presence of various concentrations of (a) **1**, (b) **2**, (c) **3** and (d) **4** in 0.5 M H<sub>2</sub>SO<sub>4</sub>.

**Table S2.** Electrochemical parameters of carbon steel in the absence or presence of different concentrations of TPE-based inhibitors by PDP measurements in 0.5 M H<sub>2</sub>SO<sub>4</sub>.

| Inhibitor | $c$ / (mg/L) | $I_{\text{corr}}$ / ( $\mu\text{A}/\text{cm}^2$ ) | $E_{\text{corr}}$ / V | $\beta_c$ / (mV/dec) | $\beta_a$ / (mV/dec) | $\eta_p$ / % |
|-----------|--------------|---------------------------------------------------|-----------------------|----------------------|----------------------|--------------|
| Blank     | —            | 1701.0                                            | -0.503                | 146.3                | 113.2                | \            |
| <b>1</b>  | 20           | 1006.0                                            | -0.507                | 126.9                | 95.9                 | 40.9         |
|           | 40           | 1149.0                                            | -0.509                | 132.9                | 102.0                | 32.5         |
|           | 70           | 212.2                                             | -0.474                | 145.1                | 75.7                 | 87.5         |
|           | 100          | 57.5                                              | -0.502                | 141.7                | 48.1                 | 96.6         |
| <b>2</b>  | 20           | 166.2                                             | -0.477                | 155.7                | 92.7                 | 90.2         |
|           | 40           | 97.3                                              | -0.465                | 139.3                | 77.2                 | 94.3         |
|           | 70           | 97.3                                              | -0.467                | 140.5                | 80.4                 | 94.3         |
|           | 100          | 55.1                                              | -0.427                | 203.2                | 51.5                 | 96.8         |
| <b>3</b>  | 20           | 126.9                                             | -0.464                | 165.4                | 81.8                 | 92.5         |
|           | 40           | 106.3                                             | -0.470                | 160.1                | 74.8                 | 93.8         |
|           | 70           | 58.0                                              | -0.500                | 145.8                | 50.7                 | 96.6         |
|           | 100          | 32.2                                              | -0.481                | 140.7                | 44.5                 | 98.1         |
| <b>4</b>  | 20           | 43.7                                              | -0.482                | 107.9                | 52.6                 | 97.4         |
|           | 40           | 44.7                                              | -0.488                | 111.3                | 64.7                 | 97.4         |
|           | 70           | 65.1                                              | -0.482                | 114.8                | 80.1                 | 96.2         |
|           | 100          | 35.6                                              | -0.493                | 99.1                 | 118.4                | 97.9         |

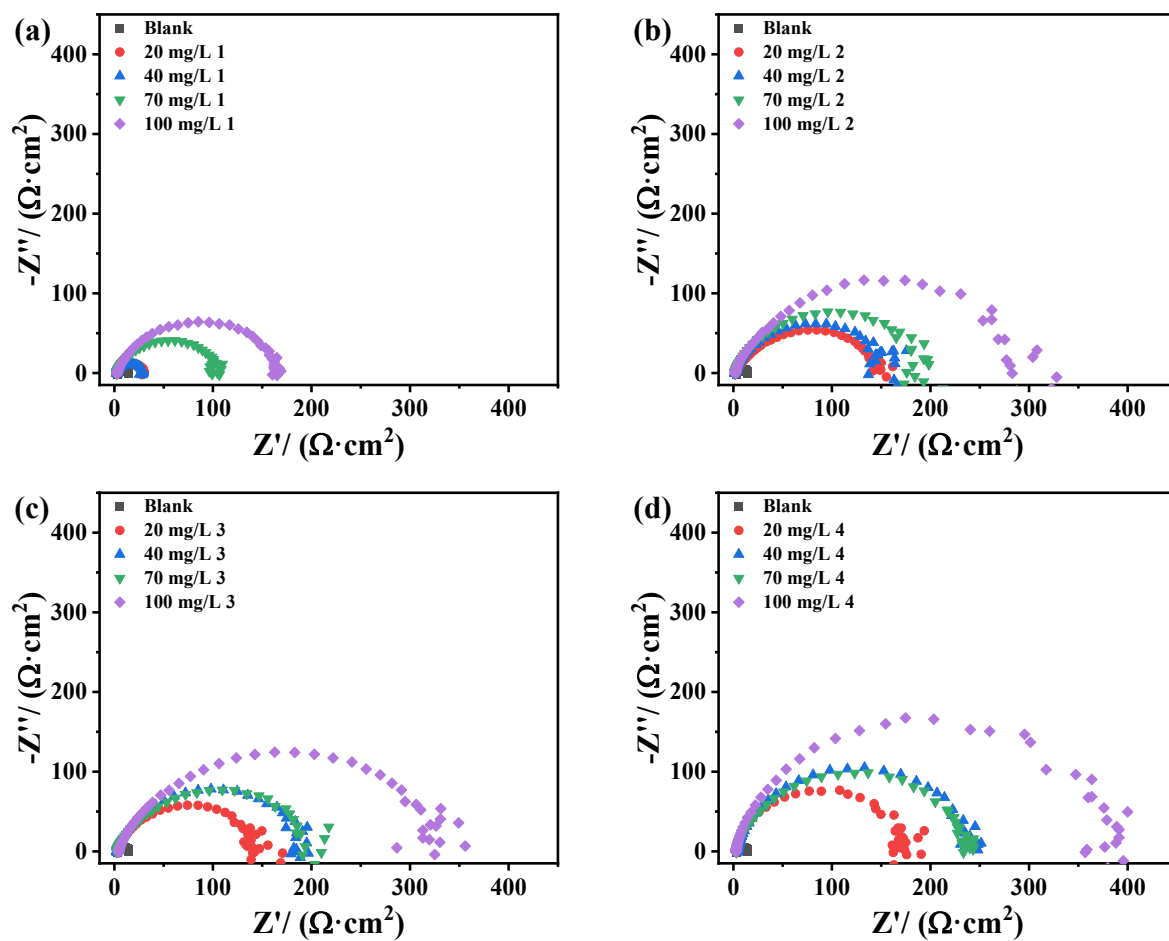

**Fig. S6.** EIS curves for carbon steel in the absence or presence of various concentrations of (a) 1, (b) 2, (c) 3 and (d) 4 in 0.5 M  $\text{H}_2\text{SO}_4$ .

**Table S3.** Electrochemical parameters of carbon steel in the absence or presence of different concentrations of TPE-based inhibitors by EIS measurements in 0.5 M H<sub>2</sub>SO<sub>4</sub>.

| Inhibitor | $c$ / (mg/L) | $R_s$ / ( $\Omega/\text{cm}^2$ ) | $R_{ct}$ / ( $\Omega/\text{cm}^2$ ) | $\eta_E$ / % |
|-----------|--------------|----------------------------------|-------------------------------------|--------------|
| Blank     | —            | 2.7                              | 11.8                                | —            |
| <b>1</b>  | 20           | 2.0                              | 27.66                               | 57.3         |
|           | 40           | 2.8                              | 26.31                               | 55.2         |
|           | 70           | 2.1                              | 105.6                               | 88.8         |
|           | 100          | 2.8                              | 162.3                               | 92.7         |
| <b>2</b>  | 20           | 2.4                              | 146.6                               | 92.0         |
|           | 40           | 1.6                              | 156.5                               | 92.5         |
|           | 70           | 1.5                              | 192.2                               | 93.9         |
|           | 100          | 1.9                              | 287.9                               | 95.9         |
| <b>3</b>  | 20           | 3.0                              | 140.1                               | 91.6         |
|           | 40           | 2.6                              | 191.0                               | 93.8         |
|           | 70           | 2.2                              | 201.2                               | 94.1         |
|           | 100          | 3.8                              | 331.5                               | 96.4         |
| <b>4</b>  | 20           | 3.4                              | 170.5                               | 93.1         |
|           | 40           | 3.9                              | 237.9                               | 95.0         |
|           | 70           | 3.1                              | 232.2                               | 94.9         |
|           | 100          | 3.0                              | 383.0                               | 96.9         |



Reference:

- [S1] J.-B. Xiong, W.-Z. Xie, J.-P. Sun, J.-H. Wang, Z.-H. Zhu, H.-T. Feng, D. Guo, H. Zhang, Y.-S. Zheng, Enantioselective Recognition for Many Different Kinds of Chiral Guests by One Chiral Receptor Based on Tetraphenylethylene Cyclohexylbisurea, *J. Org. Chem.*, 2016, **81**, 3720-3726.
- [S2] A. Schreivogel, J. Maurer, R. Winter, A. Baro, S. Laschat, Synthesis and Electrochemical Properties of Tetrasubstituted Tetraphenylethenes, *Eur. J. Org. Chem.*, 2006, **2006**, 3395-3404.
- [S3] J. Lu, J. Zhang, Facile synthesis of azo-linked porous organic frameworks via reductive homocoupling for selective CO<sub>2</sub> capture, *J. Mater. Chem. A*, 2014, **2**, 13831-13834.
- [S4] T. Yu, D. Ou, Z. Yang, Q. Huang, Z. Mao, J. Chen, Y. Zhang, S. Liu, J. Xu, M.R. Bryce, Z. Chi, The HOF structures of nitrotetraphenylethene derivatives provide new insights into the nature of AIE and a way to design mechanoluminescent materials, *Chem. Sci.*, 2017, **8**, 1163-1168.
- [S5] W. Zhao, Z. He, Q. Peng, J. W. Y. Lam, H. Ma, Z. Qiu, Y. Chen, Z. Zhao, Z. Shuai, Y. Dong, B. Z. Tang, Highly sensitive switching of solid-state luminescence by controlling intersystem crossing, *Nat. Commun.*, 2018, **9**, 3044-3051.
- [S6] G. L. F. Mendonça, S. N. Costa, V. N. Freire, P. N. S. Casciano, A. N. Correia and P. D. Lima-Neto, Understanding the corrosion inhibition of carbon steel and copper in sulphuric acid medium by amino acids using electrochemical techniques allied to molecular modelling methods, *Corros. Sci.*, 2017, **115**, 41-55.

- [S7] Y. Tang, X. Yang, W. Yang, R. Wan, Y. Chen and X. Yin, A preliminary investigation of corrosion inhibition of mild steel in 0.5M H<sub>2</sub>SO<sub>4</sub> by 2-amino-5-(n-pyridyl)-1,3,4-thiadiazole: Polarization, EIS and molecular dynamics simulations, *Corros. Sci.*, 2010, **52**, 1801-1808.
- [S8] M. M. Saleh, Inhibition of mild steel corrosion by hexadecylpyridinium bromide in 0.5 M H<sub>2</sub>SO<sub>4</sub>, *Mater. Chem. Phys.*, 2006, **98**, 83-89.
- [S9] B. Qian, J. Wang, M. Zheng and B. Hou, Synergistic effect of polyaspartic acid and iodide ion on corrosion inhibition of mild steel in H<sub>2</sub>SO<sub>4</sub>, *Corros. Sci.*, 2013, **75**, 184-192.
- [S10] M. Bouklah, N. Benchat, A. Aouniti, B. Hammouti, M. Benkaddour, M. Lagrenée, H. Vezin and F. Bentiss, Effect of the substitution of an oxygen atom by sulphur in a pyridazinic molecule towards inhibition of corrosion of steel in 0.5M H<sub>2</sub>SO<sub>4</sub> medium, *Prog. Org. Coat.*, 2004, **51**, 118-124.
- [S11] C. Lai, X. L. Su, T. Jiang, L. Zhou, B. Xie, Y. Li, L. Zou. Corrosion inhibition of q235 steel in H<sub>2</sub>SO<sub>4</sub> solution by n,n- diethylammonium o,o'-di(4-bromophenyl) dithiophosphate, *Int. J. Electrochem. Sci.*, 2016, **11**, 9413-9423.
- [S12] Y. Liu, W. Du, X. Yao, C. Liu, X. Luo, L. Guo, C. Guo, Electrochemical and Theoretical Study of Corrosion Inhibition on X60 Steel in H<sub>2</sub>SO<sub>4</sub> Solution by Omeprazole, *Int. J. Electrochem. Sci.*, 2022, **17**, 220516.
- [S13] M. Tang, X. Li, S. Deng and R. Lei, Synergistic inhibition effect of Mikania micrantha extract with KI on steel corrosion in H<sub>2</sub>SO<sub>4</sub> solution, *J. Mol. Liq.*, 2021, **344**, 117926.
- [S14] O. Benali, M. Zebida, F. Benhiba, A. Zarrouk and U. Maschke, Carbon steel corrosion inhibition in H<sub>2</sub>SO<sub>4</sub> 0.5 M medium by thiazole-based molecules: Weight loss, electrochemical,

XPS and molecular modeling approaches, *Colloids Surf. A Physicochem. Eng. Asp.*, 2021, **630**, 127556.

[S15] N. O. Obi-Egbedi and I. B. Obot, Inhibitive properties, thermodynamic and quantum chemical studies of alloxazine on mild steel corrosion in  $\text{H}_2\text{SO}_4$ , *Corros. Sci.*, 2011, **53**, 263-275.

[S16] A. S. Algaber, E. M. El-Nemma and M. M. Saleh, Effect of octylphenol polyethylene oxide on the corrosion inhibition of steel in 0.5 M  $\text{H}_2\text{SO}_4$ , *Mater Chem. Phys.*, 2004, **86**, 26-32.
